# Supplementary material for: Measures of central sensitisation and their measurement properties in the adult musculoskeletal trauma population: a protocol for a systematic review and data synthesis
Source: PubMed Central journal article supplement — BMJ Open. 2019 Mar 23;9(3):e023204. doi: 10.1136/bmjopen-2018-023204 (PMC6475353; doi:10.1136/bmjopen-2018-023204), 2019-03-23
Supplement: bmjopen-2018-023204supp003.pdf [file bmjopen-2018-023204supp003.pdf]

## Supplementary File 3: Search Strategy & Terms

### Stage 1

1. exp wounds and Injuries
2. musculoskeletal trauma.mp
3. musculoskeletal injury.mp
4. musculoskeletal injuries.mp
5. orthopedic trauma.mp
6. orthopaedic trauma.mp
7. orthopaedic Injury.mp
8. orthopaedic Injuries.mp
9. orthopedic Injury.mp
10. orthopedic Injuries.mp
11. lower extremity injur\*.mp
12. upper extremity injur\*.mp
13. exp fractures, bone
14. exp whiplash injuries
15. exp athletic injuries
16. exp multiple trauma
17. traumatic injury.mp
18. traumatic injuries.mp
19. 1-18 OR
20. central pain.mp
21. central sensitisation.mp
22. central sensitization.mp
23. exp central nervous system sensitization
24. central sensitivity.mp
25. central hypersensitivity.mp
26. central pain modulation.mp
27. exp pain perception
28. pain processing.mp
29. exp pain threshold
30. central pain processing
31. exp hyperalgesia
32. widespread pain.mp
33. pain modulation.mp
34. pain sensitisation.mp
35. pain sensitization.mp
36. allodynia.mp
37. 20-38 OR
38. 19 AND 39
39. 41 to humans

### Stage 2:

40. exp reproducibility of results
41. exp psychometrics
42. reliability.mp
43. responsiveness.mp
44. exp sensitivity and Specificity

45. clinical sensitivity.mp
46. validity.mp
47. exp validation studies
48. exp Evaluation studies
49. internal consistency.mp
50. measurement error.mp
51. interpretability.mp
52. measurement properties.mp
53. 42-54 OR
54. AND outcome measure name identified.
55. 56 limit to humans
